# Supplementary material
Source: PubMed Central journal article supplement (PMC6339851)

**A**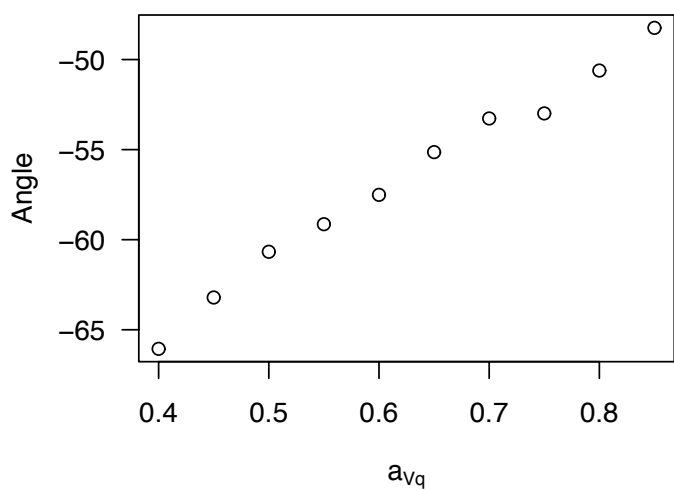**B**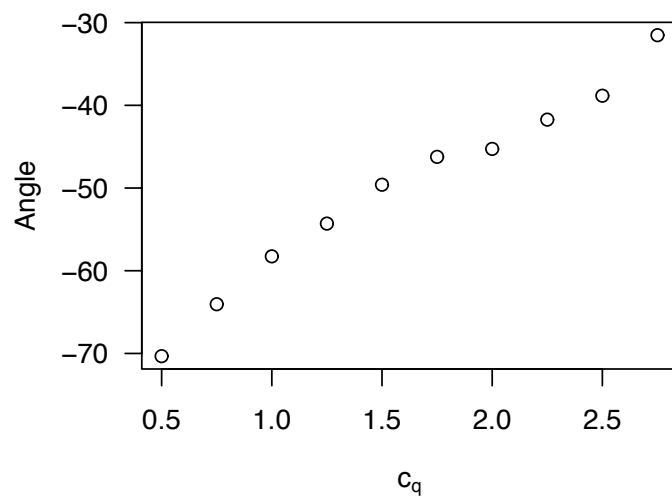**C**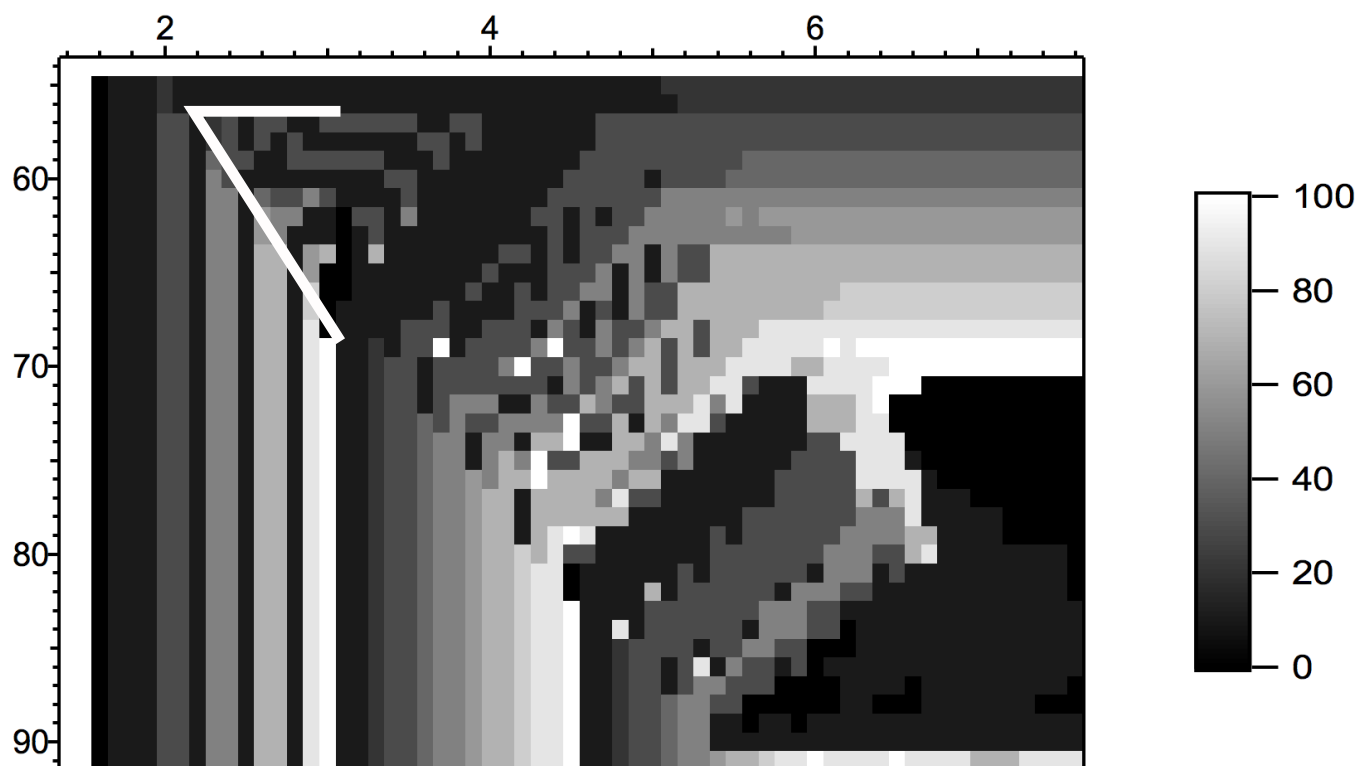

Supplement: NIHMS1512709-supplement-4.pdf [file NIHMS1512709-supplement-4.pdf]
